# Supplementary material for: Internal Details Corroborate the Occurrence of Flower Bud in the Lower Cretaceous of China
Source: Preprints.org preprint supplement (doi:10.20944/preprints202404.0419.v1), 2024-04-05
Supplement: Supplementary file 3 [file supplementary]

Supplementary Material


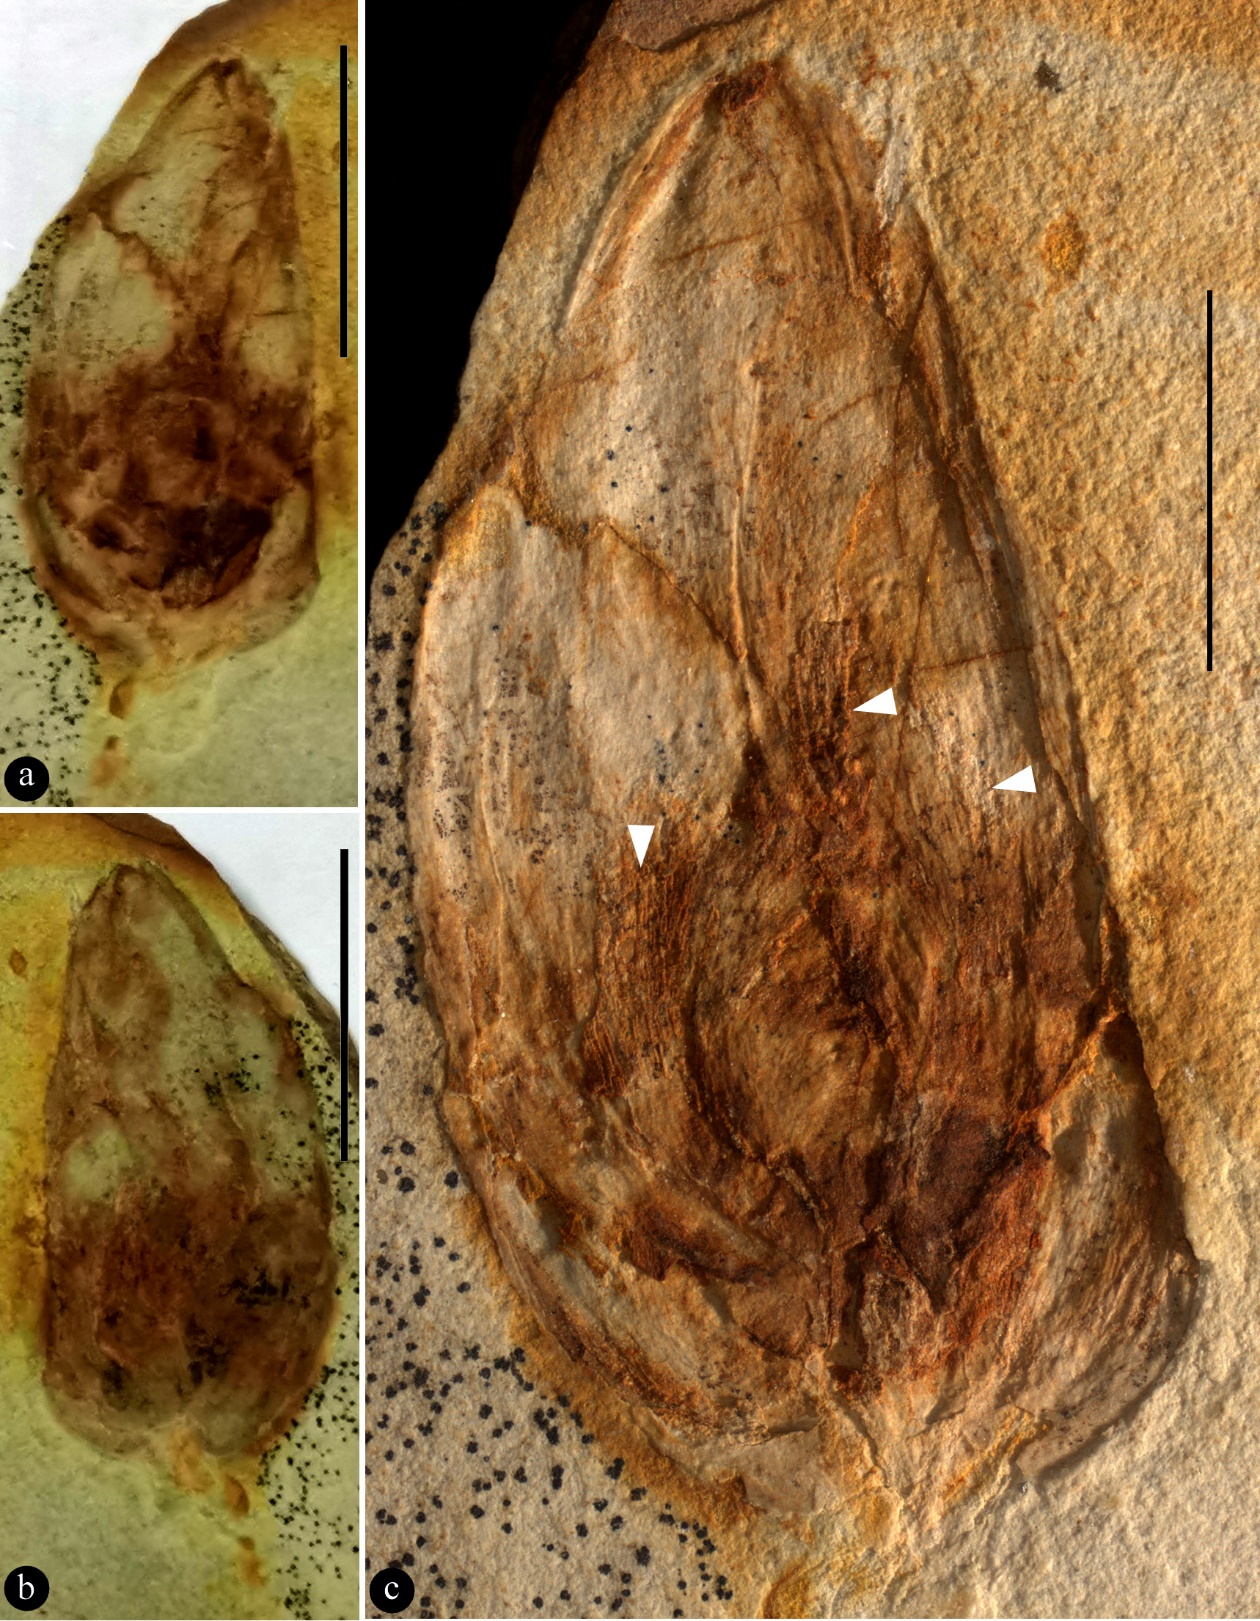


**Figure S1.** More information of *Archaebuda cretaca* sp. nov. **a-b**. Two facing parts of the same specimen. Scale bar = 10 mm. **c**. Enlargement showing details of the flower bud. Note variable textures distinguish one petal from another. Possible androecium is marked with white triangles. Scale bar = 5 mm.
